# Supplementary material for: The BEL1-like family of transcription factors in potato
Source: PubMed Central journal article supplement (PMC3904721; doi:10.1093/jxb/ert432), 2014-01-27
Supplement: supp_ert432_jexbot108571_file001.pdf [file supp_ert432_jexbot108571_file001.pdf]

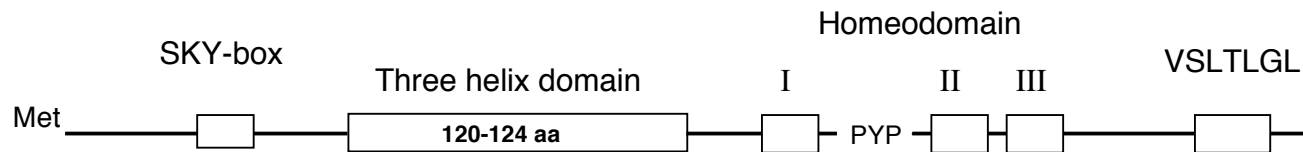

**Figure S1.** Protein structure of StBELs. All StBELs contain a SKY box, a BELL domain and a homeodomain made up of three helices. A conserved three aa loop extension (TALE), proline-tyrosine-proline (PYP), is located between the first and second helices. The VSLTLGL motif is conserved but its function is unknown.



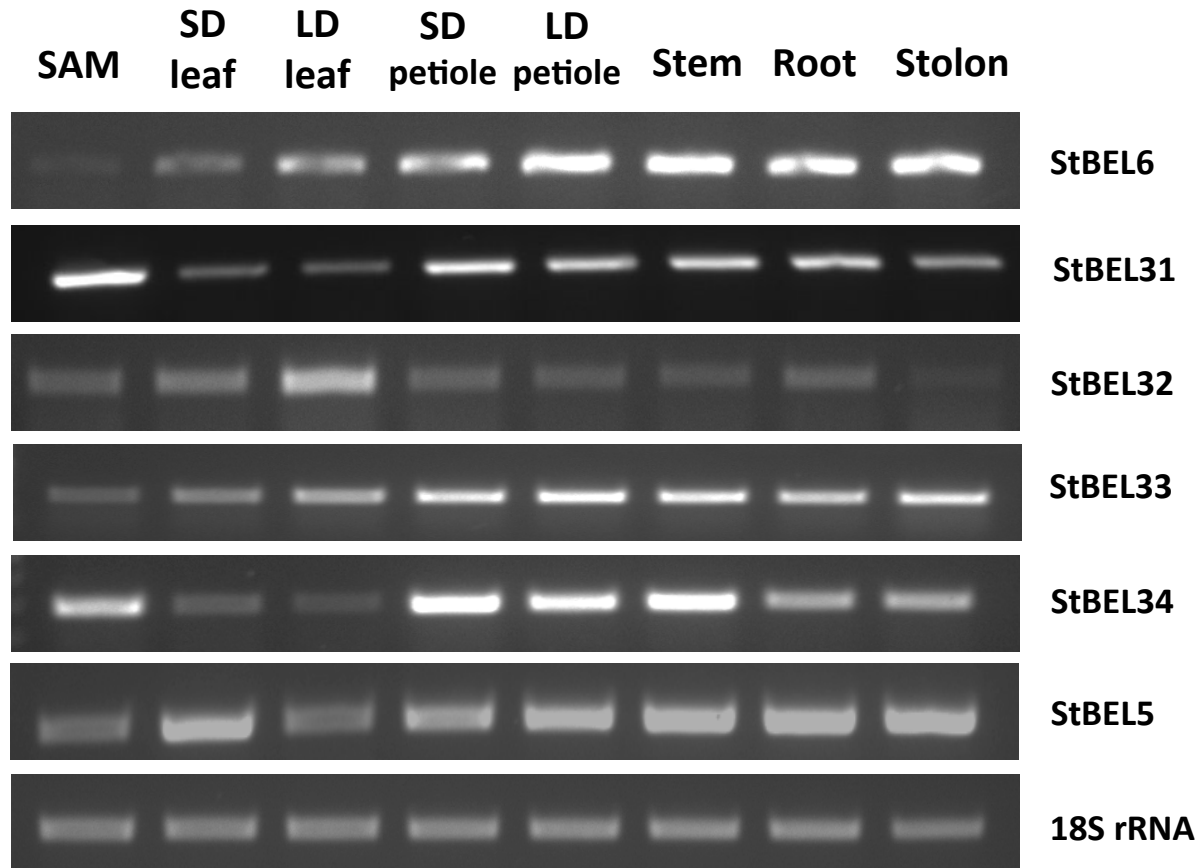

**Fig. S3.** RT-PCR with gene-specific primers for *StBEL5*, *-6*, *-31*, *-32*, *-33* and *-34* using total RNA extracted from the shoot apical meristem (SAM), leaf (SD and LD), petiole (SD and LD), stem, root and stolon of soil-grown potato plants, *Solanum tuberosum* ssp. *andigena*. RT-PCR product for 18S rRNA was used as an internal control.

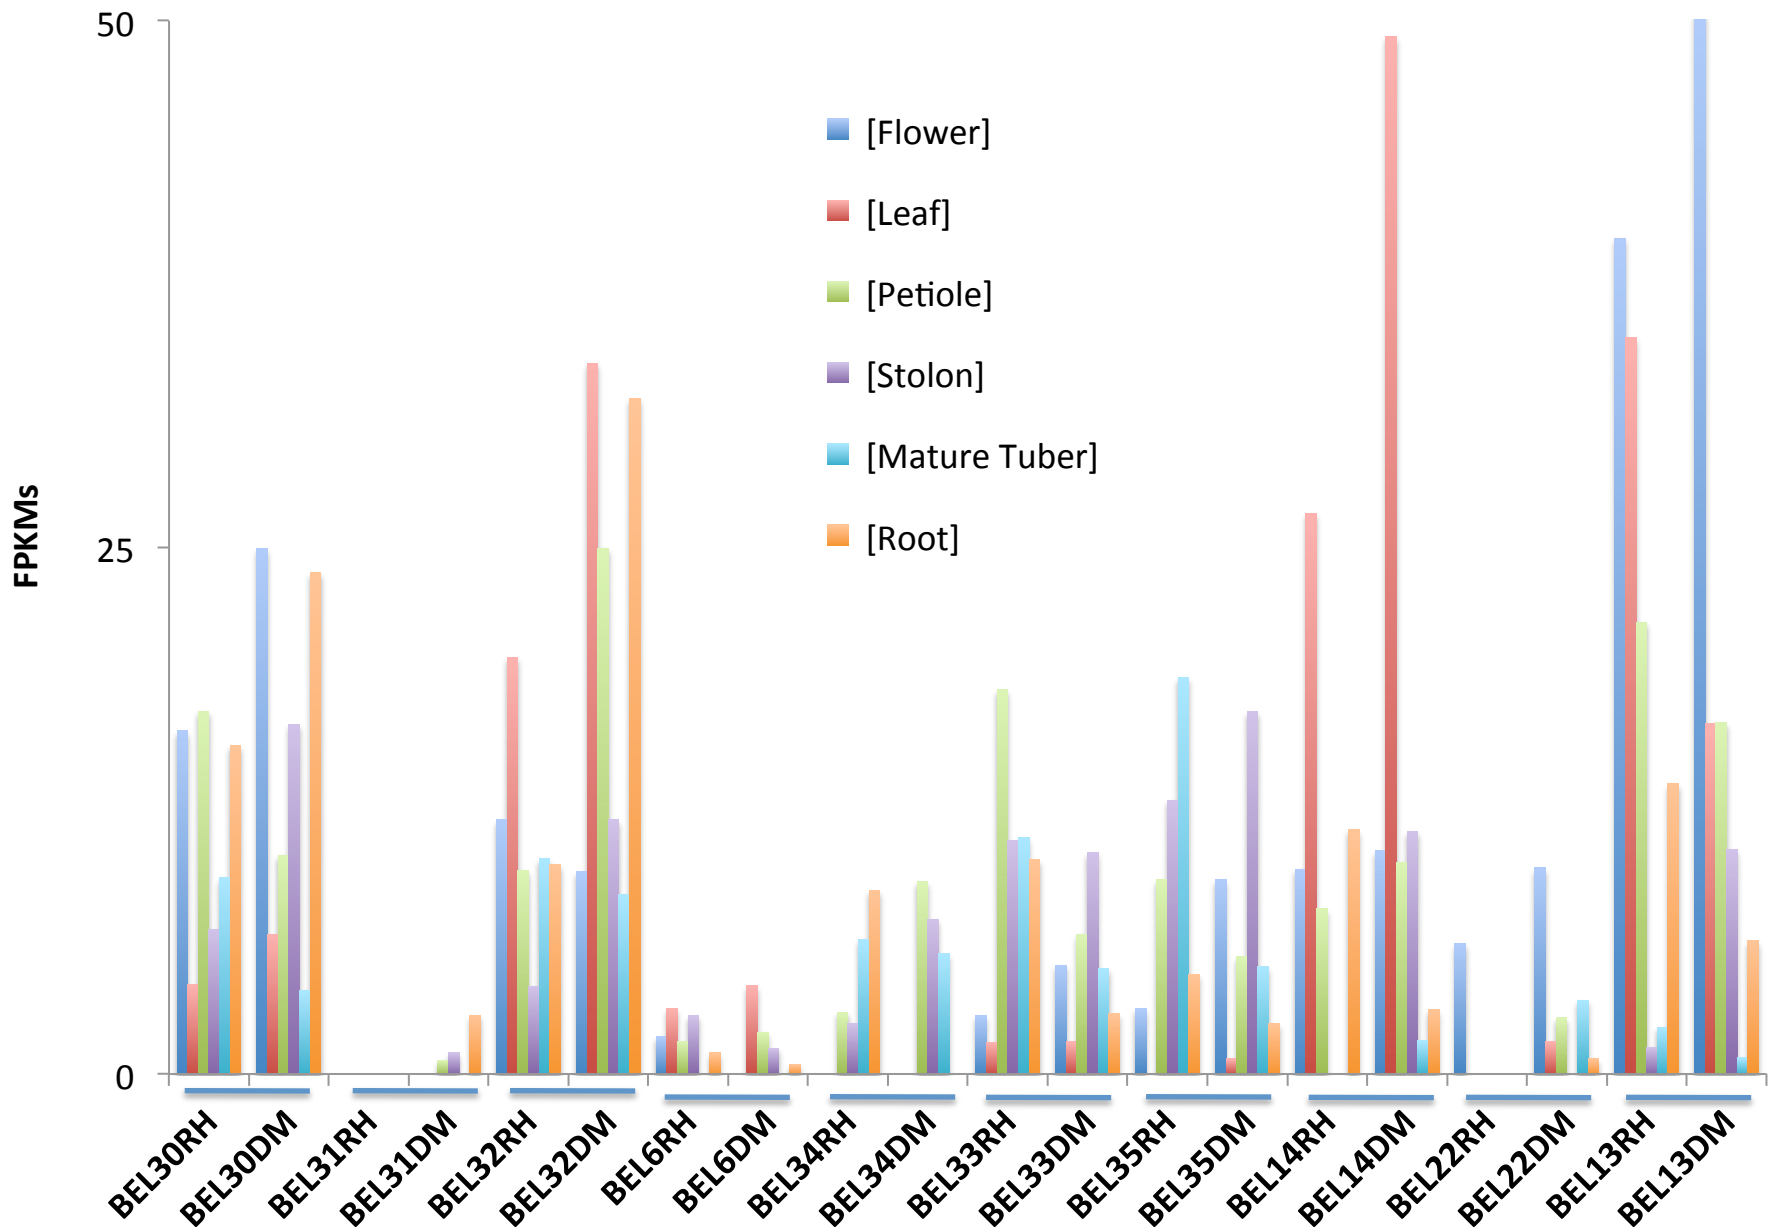

**Figure S4.** Expression profile for StBEL family members mined using the RNA-seq data from the publicly available Potato Genome Database from both the RH and DM genotypes (Xu *et al.*, 2011). Six organs and ten StBELs are presented and abundance values are shown in FPKMs (fragments per kb per million mapped reads).

**Table S1.** Primers and oligonucleotides

For qRT-PCR of BELs LD/SD

BEL5-F: AGGGATACTCTTATATTGTGTGAGG  
BEL5-R: GTCTCCACTTCTTTTCTCCTATG  
BEL6-F: GGATGCAGAGAAGCAATTGCTGG  
BEL6-R: TGGTTTCCATAGACGAACTCGAG  
BEL31-F: CTCCATCCATATCCAAATGACTC  
BEL31-R: CGTTAATAAACCAGTTGGAAACCTGA  
BEL32-F: TGCTGTTTCAGTCCTTCGTGCTT  
BEL32-R: AACCTGTTTGCCTCGCCAGCATGAT  
BEL33-F: CTTCTGAACGTGCTGTCCTGTA  
BEL33-R: CATTACTTTATCGCTGTCCGTGG  
BEL34-F: GCACATGTTGGCTTCTCAAAC  
BEL34-R: CATCCGATTTTCTTGTGTTGATCTC  
BEL35-F: GACTGGTCTTTCAAGGAATCAG  
BEL35-R: GTGTATTTCTTCAACCATAGGC  
Actin-F: GGAAAAGCTTGCCTATGTGG  
Actin-R: CTGCTCCTGGCAGTTTCAA

For cloning Y2H constructs

StBEL6fw: CATGCCATGGAGATGGCAGAGCCTCATCGG  
StBEL6rev: TCCCCCGGGTCACTTCATTGTAAATAAATG

StBEL31fw: GAATTCGAATGGTTTCAAAGACTCACCCC  
StBEL31rev: CTCGAGTCATTCTTCTGCAGAATCAGTAACAC

StBEL32fw: CATGCCATGGAGATGTCTGCTTACTATTCAAATTTG  
StBEL32rev: TCCCCCGGGTTACTACTACAAAATCGGATAG

StBEL33fw: CATGCCATGGAGATGGCTGAAGGATTTGAAC  
StBEL33rev: TCCCCCGGGTCAACCACCAAATCATGC

StBEL34fw: CGGGATCCGAATGGTGGCTTTTTTGGCGATG  
StBEL34rev: CCGCTCGAGTCAATCAACAAAGTCATG

StBEL35fw: GAATTCGAATGGCTGCAGAAGGATTTGAA  
StBEL35rev: CTCGAGTCAACCAACAAAATCATGCAAC

GSPs for BEL6, -14, -22, and -34 of Fig. 8

BEL6Fw: GTATGCTGAGATGAATAGAAG  
BEL6Rv: GGCATAGCATACAACATGG

BEL34Fw: CGGATGTGAATAAGCTCGTG  
BEL34Rv: CAGCTCCGATATTACCTCC

18SFw: GGATGTTGCTTTTAGGACTC  
81SRv: CATCACAGACCTGTTATTGC

BEL22Fw: ATTGTCGCAATGAATACACATTA  
BEL22Rv: TTATGTAGCAGTGTTTGAATACAC

BEL14Fw: TATGGAAGCCAATGGTGGAAAG  
BEL14Rv: ATGATCCACCACTTCCACCAT

Oligos for EMSA DNA bait 6, 22, and 34 for Fig. 9

BEL6S: TGCTTGCCTTTTGACAGTCACTATTGTATG  
BEL6A: CATACAATAGTGACTGTCAAAAGGCAAGCA

BEL22S: TATGTCCGTTGCATAATTAGTCACAATTGACATGCTCCTATTAGATATAA  
BEL22A: TTATATCTAATAGGAGCATGTCAATTGTGACTAATTATGCAACGGACATA

BEL34S: CCTTTCAATAAGATTATTGACGGTGACAATACTCGCCGTCAAA  
BEL34A: TTTGACGGCGAGTATTGTCACCGTCAATAATCTTATTGAAAGG

**Table S2**

| <b>Chr no.</b> | <b>Size of chr</b> | <b>BEL gene location</b>                                        |                                                                                                                                 |
|----------------|--------------------|-----------------------------------------------------------------|---------------------------------------------------------------------------------------------------------------------------------|
| chr01          | 81.48 Mbp          | (BEL29) 3.678 kbp from chr01, positions 2,458,978 to 2,462,655  | (BEL30)5.85 kbp from chr01, positions 79,264,769 to 79,270,618                                                                  |
| chr02          | 47.07 Mbp          | (BEL13)7.139 kbp from chr02, positions 43,219,985 to 43,227,123 | (BEL22)5.199 kbp from chr02, positions 23,380,997 to 23,386,195                                                                 |
| chr03          | 47.88 Mbp          | none                                                            |                                                                                                                                 |
| chr04          | 64.34 Mbp          | (BEL31)2.258 kbp from chr04, positions 62,325,726 to 62,327,983 | (BEL32)4.917 kbp from chr04, positions 62,330,004 to 62,334,920<br>bel31 and 32 are 2.021 kbp apart, tandemly duplicated genes? |
| chr05          | 47.05 Mbp          | none                                                            |                                                                                                                                 |
| chr06          | 54.98 Mbp          | (BEL5)4.015 kbp from chr06, positions 49,229,263 to 49,233,277  |                                                                                                                                 |
| chr07          | 53.43 Mbp          | none                                                            |                                                                                                                                 |
| chr08          | 43.65 Mbp          | (BEL14)4.946 kbp from chr08, positions 43,062,646 to 43,067,591 | (BEL6)2.659 kbp from chr08, positions 24,072,529 to 24,075,187                                                                  |
| chr09          | 53.64 Mbp          | (BEL33)5.086 kbp from chr09, positions 5,515,256 to 5,520,341   |                                                                                                                                 |
| chr10          | 52.31 Mbp          | (BEL35)4.593 kbp from chr10, positions 50,859,636 to 50,864,228 |                                                                                                                                 |

|       |           |                                                                       |                                                                          |                                                 |
|-------|-----------|-----------------------------------------------------------------------|--------------------------------------------------------------------------|-------------------------------------------------|
| chr11 | 42.25 Mbp | (BEL34)4.122 kbp from chr11,<br>positions 38,532,179 to<br>38,536,300 | (BEL11)6.483 kbp from<br>chr11, positions<br>37,602,233 to<br>37,608,715 | <b>BEL34 and 11<br/>are 0.923 Mbp<br/>apart</b> |
| chr12 | 59.1 Mbp  | none                                                                  |                                                                          |                                                 |



| BEL       | Gene                        | Flower      | Tuber Sprout | Leaf        | Petiole      | Shoot Apex  | Stem        | Stolon    | Young Tuber | Mature Tuber | Root         |
|-----------|-----------------------------|-------------|--------------|-------------|--------------|-------------|-------------|-----------|-------------|--------------|--------------|
| 31        | PGSC0003DMG400003750        | 0           | 2.5          | 0           | 0            | 2.7         | 0           | 0         | 0           | 0            | 0            |
| 32        | PGSC0003DMG400003751        | 12          | 10.3         | 19.8        | 9.7          | 8.8         | 16.6        | 4.2       | 5.5         | 10.2         | 9.9          |
| <b>5</b>  | <b>PGSC0003DMG400005930</b> | <b>35</b>   | <b>60</b>    | <b>39</b>   | <b>170.3</b> | <b>25</b>   | <b>76.7</b> | <b>24</b> | <b>55.4</b> | <b>76.4</b>  | <b>41.6</b>  |
| 34        | PGSC0003DMG400008057        | 0           | 15.1         | 0           | 2.9          | 2.5         | 7.8         | 2.4       | 4.1         | 6.4          | 8.7          |
| 13        | PGSC0003DMG400010086        | <b>39.7</b> | 4.1          | <b>34</b>   | 21.4         | <b>45</b>   | 14.2        | 1.3       | 1           | 2.2          | 13.8         |
| 14        | PGSC0003DMG400012329        | 9.7         | 2.7          | <b>26.6</b> | 7.8          | 2.51        | 3.6         | 0         | 0           | 0            | 11.6         |
| 35        | PGSC0003DMG400019142        | 3.1         | 20.8         | 0           | 9.2          | 4.7         | 17.7        | <b>12</b> | 13.9        | <b>18.8</b>  | 4.7          |
| <b>11</b> | <b>PGSC0003DMG400019635</b> | 15.5        | <b>46.4</b>  | 4.9         | <b>120.6</b> | 3.8         | 17          | 4.7       | 11.6        | 13.4         | <b>43</b>    |
| <b>29</b> | <b>PGSC0003DMG400021323</b> | <b>66.8</b> | <b>61.5</b>  | 21.4        | <b>153</b>   | <b>22.7</b> | <b>51.5</b> | <b>23</b> | <b>22.2</b> | <b>38.4</b>  | <b>188.4</b> |
| 22        | PGSC0003DMG400022011        | 6.2         | 0            | 0           | 0            | 3.7         | 0           | 0         | 0           | 0            | 0            |
| 33        | PGSC0003DMG400024267        | 2.8         | 20.6         | 1.5         | 18.2         | 8.7         | 14          | 11.1      | <b>25.4</b> | 11.2         | 10.2         |
| 6         | PGSC0003DMG400029946        | 1.8         | 1.9          | 3.1         | 1.5          | 21.6        | 2.6         | 2.8       | 1.1         | 0            | 1            |
| 30        | PGSC0003DMG400030961        | 16.3        | 14.9         | 4.2         | 17.2         | 9.8         | <b>17.8</b> | 6.8       | 8.2         | 9.3          | 15.6         |

**Table S3.** RNA-seq data for thirteen *StBEL* genes from the RH potato genotype (Xu *et al.*, 2011). *BEL1*-like protein coding genes were identified, and the FPKM value of each is shown for several organs. Bold numbers represent the top three values in each category. *StBEL5* is the most abundant RNA in 6 of 10 organs. *BEL29* is most abundant in three others. *BEL5* and *BEL29* are top two most RNAs abundant in nine of the organs.

**Table S4.** Interaction of select tobacco KNOX proteins with potato BELs verified with  $\beta$ -galactosidase assays in the yeast two-hybrid system. The plus sign indicates strong  $\beta$ -gal induction; the negative sign, no induction. The NTH Knox genes 1, 15, 20, and 22 are from *Nicotiana tabacum*. POTH1 and the class II-Knox are from potato.

| <b>Knox type</b>     | <b>BEL5</b> | <b>BEL11</b> | <b>BEL13</b> | <b>BEL14</b> | <b>BEL22</b> | <b>BEL29</b> | <b>BEL30</b> |
|----------------------|-------------|--------------|--------------|--------------|--------------|--------------|--------------|
| <b>class II-Knox</b> | –           | –            | –            | –            | –            | –            | +            |
| <b>POTH1</b>         | +           | +            | +            | +            | +            | +            | +            |
| <b>NTH1</b>          | +           | +            | +            | +            | +            | +            | +            |
| <b>NTH15</b>         | +           | +            | +            | +            | +            | +            | +            |
| <b>NTH20</b>         | +           | +            | +            | +            | +            | +            | +            |
| <b>NTH22</b>         | +           | +            | +            | +            | +            | +            | +            |
